# Supplementary material for: Modeling non-uniformity in short-read rates in RNA-Seq data
Source: Springer Nature journal article supplement (doi:10.1186/gb-2010-11-5-r50), 2010-05-11

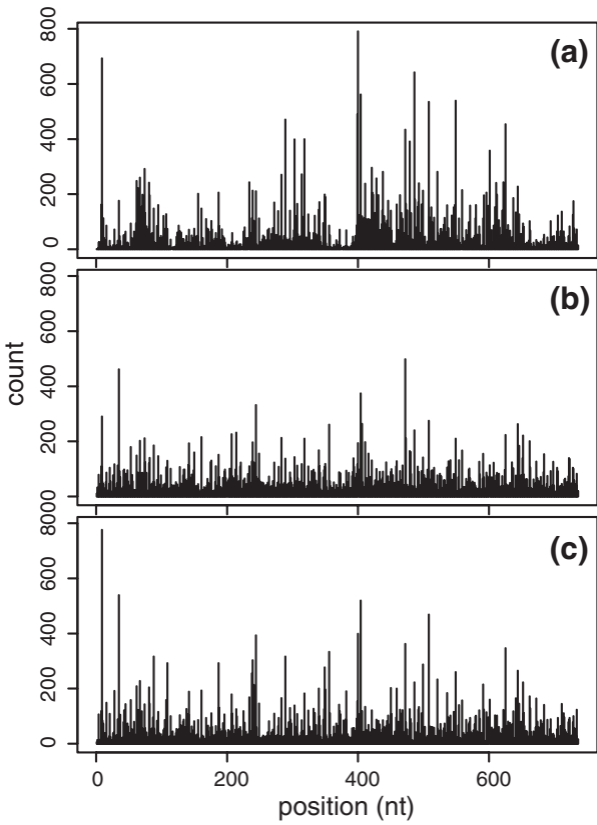

Supplement: 13059_2009_2343_MOESM4_ESM.pdf [file 13059_2009_2343_MOESM4_ESM.pdf]
