# Supplementary material for: Modeling non-uniformity in short-read rates in RNA-Seq data
Source: Springer Nature journal article supplement (doi:10.1186/gb-2010-11-5-r50), 2010-05-11

44026000

44030000

44034000

44038000

44042000

NM\_001080386

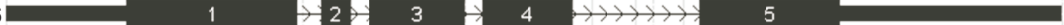

NM\_001080385

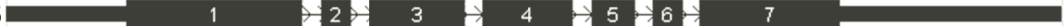

NM\_001080384

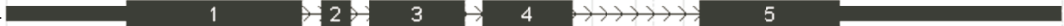

NM\_016760

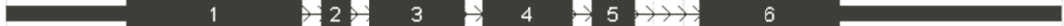

Supplement: 13059_2009_2343_MOESM6_ESM.pdf [file 13059_2009_2343_MOESM6_ESM.pdf]
